# Supplementary material
Source: Springer Nature journal article supplement (https://www.springermedizin.de/resource/supplementary/12933_2009_211_MOESM2_ESM.pdf/9539864)

**(a) Primary prevention cohort (n=5,731)**

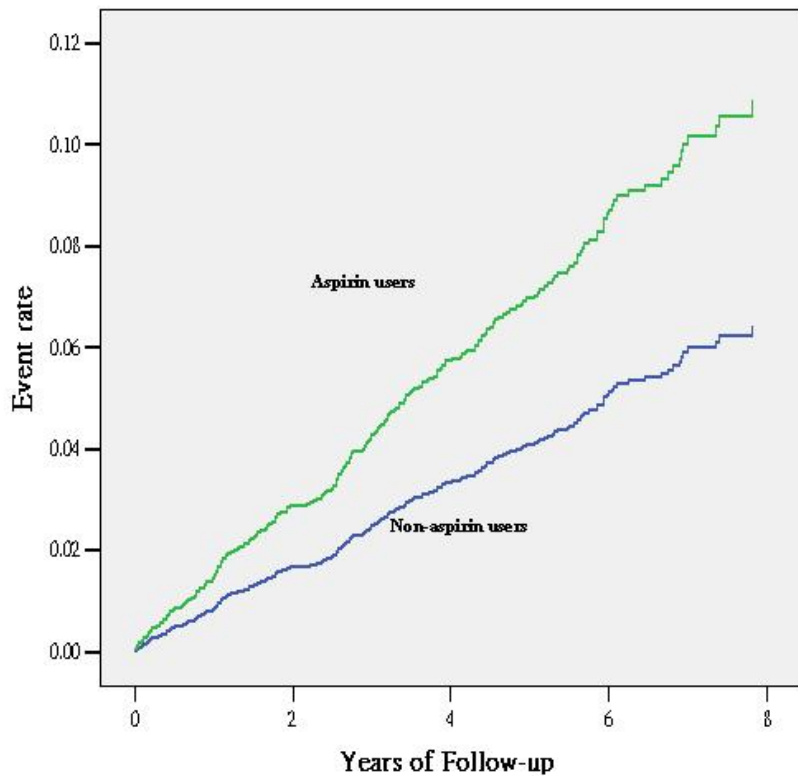

p-value: <0.001

**(b) Secondary prevention cohort (n=723)**

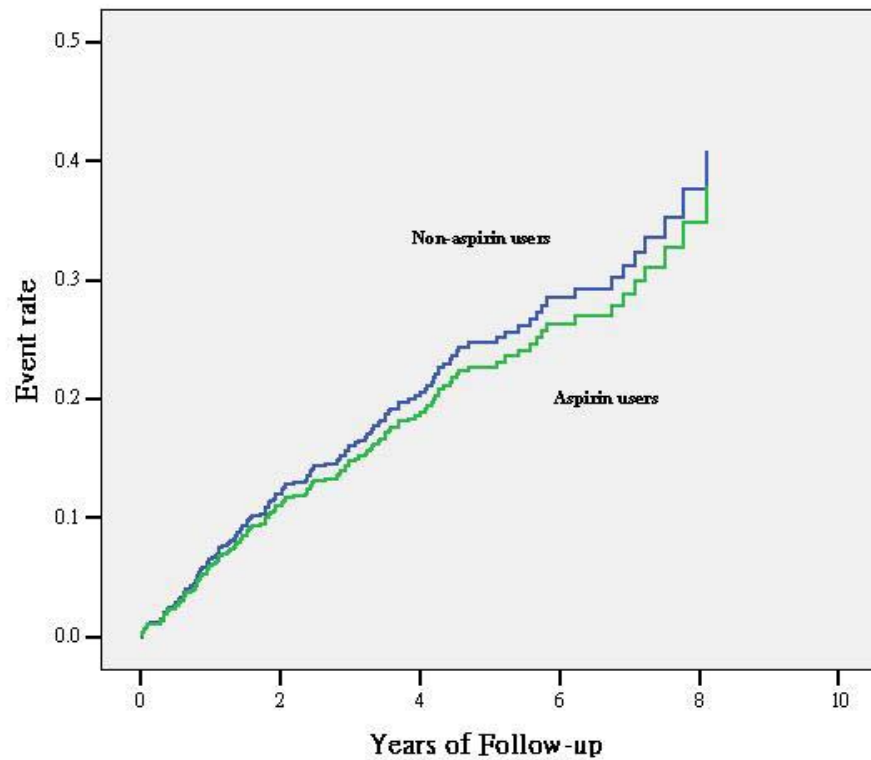

p-value: <0.001

Supplement: MOESM2 [file 9539864]
